# Supplementary material
Source: PubMed Central journal article supplement (PMC5647886)
Supplement: NIHMS849799-supplement-1.pdf [file NIHMS849799-supplement-1.pdf]

## Internal Consistency of Functional Magnetic Resonance Imaging and Electroencephalogram Measures of Reward in Late Childhood and Early Adolescence

### *Supplemental Information*

**Supplemental Table S1.** One Way T-tests for fMRI Contrasts

| Split Type | Region             | X   | Y  | Z  | Cluster Size mm | Gain  |        | Loss  |        | SCOREs |        |
|------------|--------------------|-----|----|----|-----------------|-------|--------|-------|--------|--------|--------|
|            |                    |     |    |    |                 | t     | p      | t     | p      | t      | p      |
| Even       | L Ventral Striatum | -13 | 7  | -8 | 3582            | 6.69  | <0.001 | -2.15 | 0.033  | 7.77   | <0.001 |
|            | R Ventral Striatum | 13  | 7  | -8 | 2191            | 6.06  | <0.001 | -2.28 | 0.024  | 6.95   | <0.001 |
|            | Medial PFC         | 6   | 63 | 3  | 781             | 2.42  | 0.016  | -3.84 | <0.001 | 6.67   | <0.001 |
|            | L LPFC             | -43 | 54 | 3  | 3887            | 8.10  | <0.001 | 2.60  | 0.010  | 6.33   | <0.001 |
|            | R LPFC             | 29  | 58 | -5 | 1277            | 10.36 | <0.001 | 6.03  | <0.001 | 5.58   | <0.001 |
| Odd        | L Ventral Striatum | -13 | 7  | -8 | 3582            | 6.22  | <0.001 | -0.65 | 0.517  | 6.45   | <0.001 |
|            | R Ventral Striatum | 13  | 7  | -8 | 2191            | 5.89  | <0.001 | -1.14 | 0.254  | 6.23   | <0.001 |
|            | Medial PFC         | 6   | 63 | 3  | 781             | 3.24  | 0.001  | -3.22 | 0.002  | 6.53   | <0.001 |
|            | L LPFC             | -43 | 54 | 3  | 3887            | 7.55  | <0.001 | 1.67  | 0.097  | 5.20   | <0.001 |
|            | R LPFC             | 29  | 58 | -5 | 1277            | 9.36  | <0.001 | 3.69  | <0.001 | 5.43   | <0.001 |

SCOREs = Gain-Loss, L=Left, R=Right, PFC=Prefrontal Cortex, LPFC=Lateral Prefrontal Cortex

**Supplemental Table S2.** Even versus Odd Paired T-tests for fMRI Contrasts and ERPs

| Region             | X   | Y  | Z  | Cluster Size | Gain  |       | Loss  |       | SCOREs |       |
|--------------------|-----|----|----|--------------|-------|-------|-------|-------|--------|-------|
|                    |     |    |    |              | t     | p     | t     | p     | t      | p     |
| L Ventral Striatum | -13 | 7  | -8 | 3582         | 1.50  | 0.135 | -1.67 | 0.096 | 2.18   | 0.031 |
| R Ventral Striatum | 13  | 7  | -8 | 2191         | 0.78  | 0.437 | -1.29 | 0.200 | 1.43   | 0.154 |
| Medial PFC         | 6   | 63 | 3  | 781          | -0.43 | 0.666 | -0.24 | 0.808 | -0.11  | 0.910 |
| L LPFC             | -43 | 54 | 3  | 3887         | 1.34  | 0.183 | 0.59  | 0.559 | 0.39   | 0.695 |
| R LPFC             | 29  | 58 | -5 | 1277         | 1.58  | 0.116 | 1.63  | 0.106 | -0.21  | 0.836 |
| ERP                |     |    |    |              | -0.64 | 0.524 | -0.23 | 0.815 | -0.31  | 0.759 |

SCOREs = Gain-Loss, L=Left, R=Right, PFC=Prefrontal Cortex, LPFC=Lateral Prefrontal Cortex, ERP=Event-Related Potential

**Supplemental Table S3.** Pearson Correlation Coefficients Between Win and Loss Response (fMRI) for Even/Odd Split-Halves within Reward ROIs

| Region             | X   | Y  | Z  | Cluster Size<br>mm | Even Trials | Odd Trials |
|--------------------|-----|----|----|--------------------|-------------|------------|
| L Ventral Striatum | -13 | 7  | -8 | 3582               | 0.40        | 0.55       |
| R Ventral Striatum | 13  | 7  | -8 | 2191               | 0.36        | 0.49       |
| Medial             | 6   | 63 | 3  | 781                | 0.57        | 0.53       |
| L LPFC             | -43 | 54 | 3  | 3887               | 0.58        | 0.55       |
| R LPFC             | 29  | 58 | -5 | 1277               | 0.62        | 0.63       |

L=Left, R=Right, PFC=Prefrontal Cortex, LPFC=Lateral Prefrontal Cortex

**Supplemental Table S4.** Intraclass Correlation Coefficients for fMRI and EEG Measures

| Region             | Gain | Loss | SCOREs | SCOREr |
|--------------------|------|------|--------|--------|
| L Ventral Striatum | 0.78 | 0.73 | 0.34   | 0.56   |
| R Ventral Striatum | 0.75 | 0.70 | 0.32   | 0.54   |
| Medial PFC         | 0.69 | 0.66 | 0.02   | 0.34   |
| L LPFC             | 0.79 | 0.71 | 0.20   | 0.49   |
| R LPFC             | 0.80 | 0.74 | 0.04   | 0.36   |
| ERP                | 0.86 | 0.86 | 0.37   | 0.49   |

Intraclass correlation coefficients calculated in SPSS using a mixed effects model and absolute agreement.

SCOREs = gain-loss, SCOREr = unstandardized residual gain controlling for loss, L=Left, R=Right, PFC=Prefrontal Cortex, LPFC=Lateral Prefrontal Cortex, ERP=Event-Related Potential

**Supplemental Table S5.** Intraclass Correlation Coefficients for the First and Second Half of Trials

|              | Gain     |          | Loss     |          | SCOREs   |          | SCOREr   |          |
|--------------|----------|----------|----------|----------|----------|----------|----------|----------|
|              | 1st Half | 2nd Half |
| L V Striatum | 0.77     | 0.62     | 0.71     | 0.64     | 0.36     | 0.43     | 0.55     | 0.54     |
| R V Striatum | 0.72     | 0.59     | 0.64     | 0.66     | 0.27     | 0.42     | 0.50     | 0.52     |
| M PFC        | 0.73     | 0.50     | 0.71     | 0.59     | 0.44     | 0.13     | 0.55     | 0.36     |
| L PFC        | 0.81     | 0.58     | 0.70     | 0.63     | 0.32     | 0.26     | 0.55     | 0.45     |
| R PFC        | 0.82     | 0.46     | 0.74     | 0.65     | 0.38     | 0.13     | 0.58     | 0.24     |
| ERP          | 0.79     | 0.75     | 0.75     | 0.77     | 0.21     | 0.39     | 0.45     | 0.51     |

Intraclass correlation coefficients calculated in SPSS using a mixed effects model and absolute agreement.

SCOREs = gain-loss, SCOREr = unstandardized residual gain controlling for loss, L=Left, R=Right, PFC=Prefrontal Cortex, LPFC=Lateral Prefrontal Cortex, ERP=Event-Related Potential.

**Supplemental Table S6.** Test Statistics for Age Interaction Terms from Age Moderation of Split-Half Relationships

|      | Gain     |       |          |       | Loss     |       |          |       | SCOREs   |       |          |       | SCOREr   |       |          |       |
|------|----------|-------|----------|-------|----------|-------|----------|-------|----------|-------|----------|-------|----------|-------|----------|-------|
|      | 1ST HALF |       | 2ND HALF |       | 1ST HALF |       | 2ND HALF |       | 1ST HALF |       | 2ND HALF |       | 1ST HALF |       | 2ND HALF |       |
|      | T        | P     | T        | P     | T        | P     | T        | P     | T        | P     | T        | P     | T        | P     | T        | P     |
| LVS  | 1.52     | 0.130 | 0.44     | 0.660 | -0.05    | 0.962 | 1.26     | 0.209 | 1.13     | 0.262 | 0.29     | 0.775 | 1.87     | 0.063 | 0.43     | 0.670 |
| RVS  | 0.64     | 0.521 | 0.29     | 0.769 | 1.33     | 0.186 | 0.54     | 0.593 | 1.68     | 0.094 | -0.35    | 0.730 | 1.91     | 0.058 | 0.54     | 0.592 |
| MPFC | -1.22    | 0.225 | -1.21    | 0.229 | 0.06     | 0.949 | -1.81    | 0.072 | 0.40     | 0.692 | -1.73    | 0.086 | -0.28    | 0.780 | -1.30    | 0.195 |
| LPFC | -0.13    | 0.898 | -1.96    | 0.052 | -0.89    | 0.375 | 0.85     | 0.397 | -1.15    | 0.250 | -1.92    | 0.057 | 0.37     | 0.710 | -2.21    | 0.002 |
| RPFC | 0.05     | 0.962 | 0.19     | 0.847 | 0.55     | 0.582 | 0.77     | 0.445 | -0.48    | 0.633 | -0.61    | 0.540 | -0.60    | 0.552 | -0.69    | 0.494 |
| ERP  | 1.62     | 0.107 | 0.44     | 0.660 | -1.33    | 0.186 | -0.77    | 0.443 | -0.01    | 0.994 | -0.31    | 0.758 | 1.62     | 0.107 | 0.64     | 0.524 |

SCOREs = gain-loss, SCOREr = unstandardized residual gain controlling for loss, L=Left, R=Right, PFC=Prefrontal Cortex, LPFC=Lateral Prefrontal Cortex, ERP=Event-Related Potential

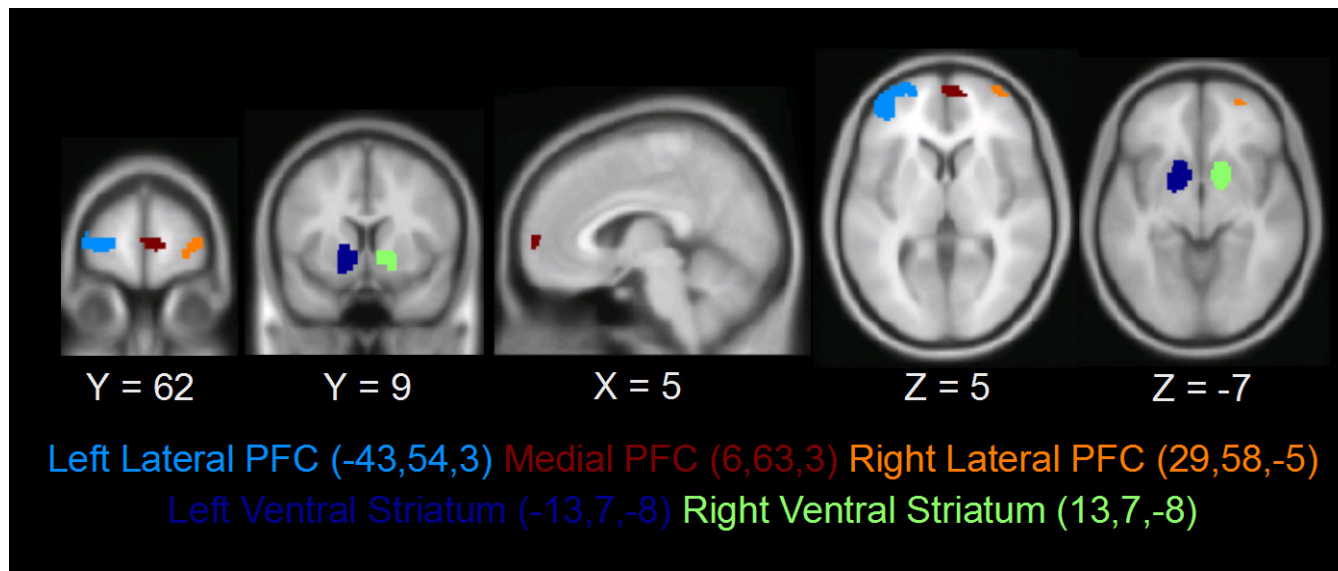

**Supplemental Figure S1.** fMRI Regions of Interest. Coordinates in MNI space. PFC=prefrontal cortex.
